# Supplementary material for: Interpreting neural networks trained to predict plasma temperature from optical emission spectra
Source: Royal Society of Chemistry journal article supplement (doi:10.1039/d3ja00363a), 2024-01-01
Supplement: d3ja00363a1.pdf [file d3ja00363a1.pdf]

## Supplementary materials

Here, we provide supplementary information to the article: “Interpreting neural networks trained to predict plasma temperature from optical emission spectra”.

### Synthetic spectra

The chemical composition of the ChemCam sample used for generating the synthetic spectra.

Table S1: The 29 considered target compositions.

| Sample number | Sample Composition (wt. %) |      |       |       |      |      |       |      |      |      |       |
|---------------|----------------------------|------|-------|-------|------|------|-------|------|------|------|-------|
|               | Si                         | Ti   | Al    | Fe    | Mn   | Mg   | Ca    | Na   | K    | P    | O     |
| 1             | 22.38                      | 0.42 | 10.55 | 12.20 | 0.00 | 5.80 | 9.12  | 0.64 | 0.05 | 0.00 | 41.74 |
| 2             | 45.81                      | 1.06 | 0.06  | 0.71  | 0.00 | 0.01 | 0.03  | 0.00 | 0.00 | 0.26 | 53.48 |
| 3             | 20.37                      | 0.26 | 8.92  | 15.92 | 0.00 | 6.74 | 6.40  | 1.28 | 0.08 | 0.00 | 40.22 |
| 4             | 23.68                      | 1.68 | 9.73  | 8.95  | 0.13 | 4.12 | 8.27  | 0.95 | 0.43 | 0.12 | 42.07 |
| 5             | 33.13                      | 0.15 | 12.26 | 0.96  | 0.02 | 0.28 | 2.14  | 2.47 | 1.03 | 0.02 | 47.61 |
| 6             | 39.69                      | 0.02 | 8.35  | 0.84  | 0.12 | 1.27 | 0.01  | 0.06 | 0.02 | 0.00 | 49.68 |
| 7             | 34.41                      | 0.20 | 9.85  | 1.41  | 0.03 | 0.22 | 0.81  | 1.42 | 4.65 | 0.03 | 47.02 |
| 8             | 35.12                      | 0.04 | 9.62  | 0.77  | 0.02 | 0.02 | 0.07  | 2.17 | 4.10 | 0.00 | 47.92 |
| 9             | 34.60                      | 0.87 | 4.89  | 4.69  | 0.07 | 2.04 | 4.23  | 0.46 | 0.22 | 0.33 | 47.42 |
| 10            | 23.63                      | 1.30 | 20.25 | 7.80  | 0.07 | 1.92 | 1.44  | 0.92 | 1.15 | 0.00 | 41.28 |
| 11            | 23.52                      | 1.69 | 9.36  | 12.62 | 0.21 | 1.79 | 4.82  | 1.40 | 1.75 | 0.82 | 41.73 |
| 12            | 29.07                      | 0.55 | 12.79 | 2.84  | 0.06 | 0.58 | 1.34  | 2.30 | 5.32 | 0.11 | 44.66 |
| 13            | 32.30                      | 0.25 | 11.30 | 3.22  | 0.07 | 1.73 | 1.21  | 1.17 | 2.30 | 0.00 | 46.03 |
| 14            | 29.45                      | 0.43 | 12.24 | 5.11  | 0.14 | 3.26 | 1.36  | 0.48 | 3.03 | 0.00 | 44.08 |
| 15            | 29.89                      | 0.35 | 12.57 | 3.29  | 0.06 | 1.19 | 3.59  | 2.00 | 1.10 | 0.06 | 45.44 |
| 16            | 22.54                      | 0.02 | 23.02 | 0.78  | 0.01 | 0.14 | 10.96 | 1.11 | 0.03 | 0.01 | 40.91 |
| 17            | 37.82                      | 0.08 | 9.07  | 3.74  | 0.14 | 0.35 | 0.07  | 0.04 | 0.10 | 0.00 | 48.12 |
| 18            | 22.63                      | 0.25 | 7.80  | 13.57 | 0.00 | 3.85 | 10.21 | 0.66 | 0.09 | 0.00 | 40.43 |
| 19            | 34.47                      | 0.02 | 11.77 | 0.40  | 0.05 | 0.01 | 0.17  | 1.70 | 3.31 | 0.20 | 47.38 |
| 20            | 37.95                      | 0.19 | 6.61  | 2.38  | 0.02 | 0.74 | 0.89  | 0.87 | 0.93 | 0.00 | 48.87 |
| 21            | 22.60                      | 0.70 | 12.49 | 7.23  | 0.13 | 5.10 | 8.70  | 0.90 | 0.16 | 0.06 | 41.38 |
| 22            | 22.30                      | 0.58 | 11.08 | 7.92  | 0.14 | 5.85 | 9.58  | 0.76 | 0.02 | 0.01 | 41.16 |
| 23            | 23.31                      | 0.96 | 12.05 | 7.37  | 0.11 | 4.45 | 6.24  | 1.61 | 0.93 | 0.20 | 42.14 |
| 24            | 35.30                      | 0.11 | 9.55  | 0.65  | 0.02 | 0.10 | 0.56  | 1.50 | 4.03 | 0.04 | 47.45 |
| 25            | 36.37                      | 0.14 | 7.41  | 2.52  | 0.06 | 1.98 | 0.01  | 0.06 | 3.45 | 0.02 | 47.28 |
| 26            | 38.90                      | 0.08 | 6.54  | 0.86  | 0.01 | 0.45 | 0.91  | 0.79 | 1.49 | 0.00 | 49.24 |
| 27            | 34.77                      | 0.02 | 10.21 | 1.22  | 0.02 | 0.04 | 0.31  | 1.88 | 3.37 | 0.00 | 47.42 |
| 28            | 24.96                      | 0.15 | 20.39 | 0.78  | 0.01 | 0.11 | 7.64  | 2.17 | 0.13 | 0.02 | 42.90 |
| 29            | 24.87                      | 0.71 | 10.54 | 10.03 | 0.15 | 2.81 | 7.07  | 0.85 | 0.35 | 0.04 | 41.81 |

# Artificial neural network

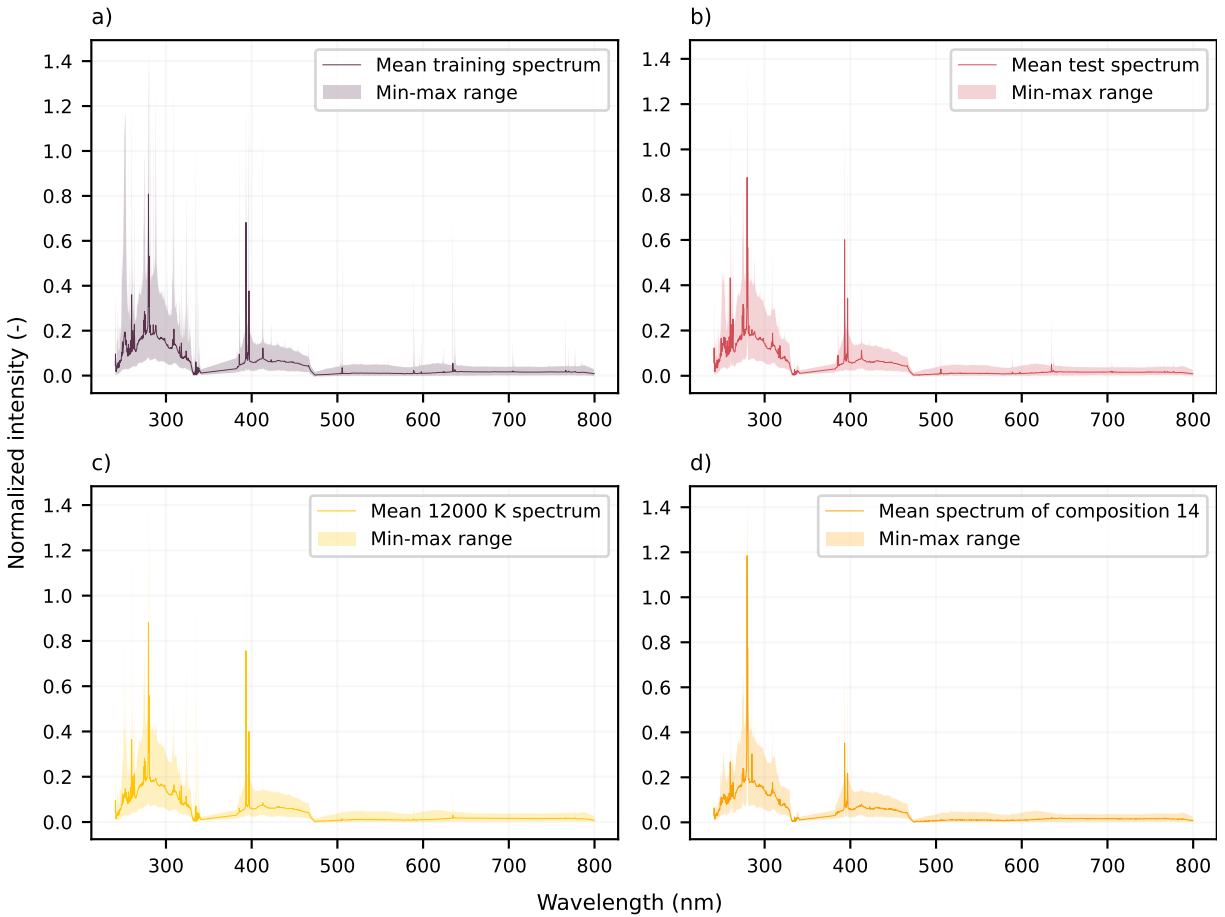

Figure S1: Summary representation of the dataset: a) mean of the training dataset; b) mean of the testing dataset; c) mean of all spectra generated at 12000 K, *i.e.*, averaged over all compositions; d) mean of all spectra of the target composition 14, *i.e.*, the average over, all temperature values. The shaded areas represent the corresponding standard deviation.

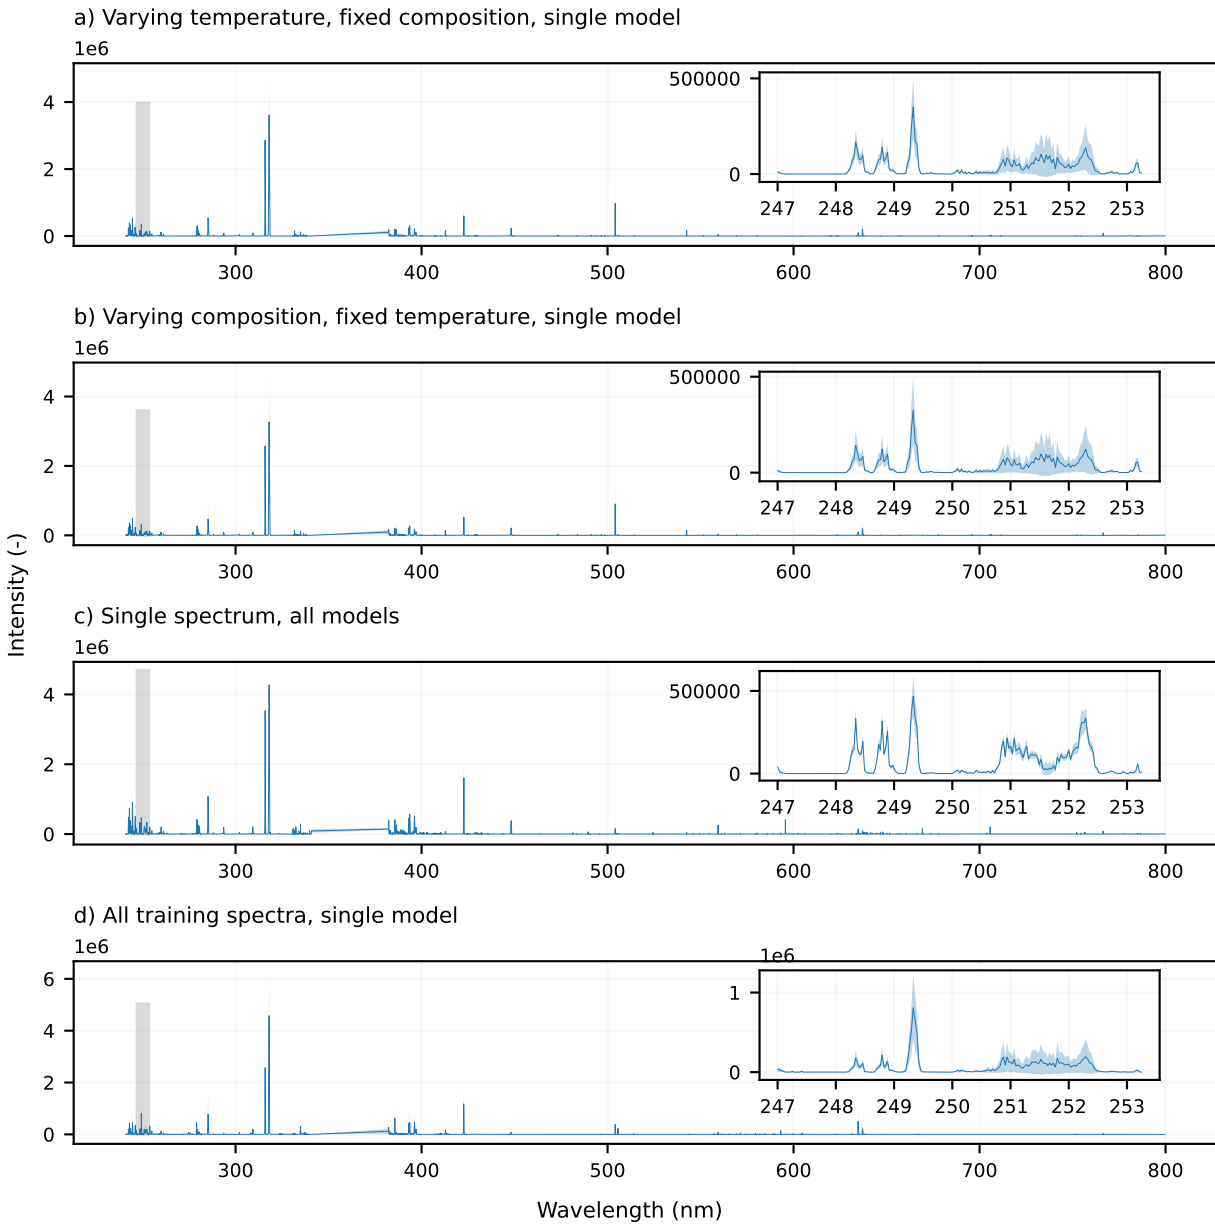

Figure S2: Summary of the relevance scores analysis: a) mean relevance scores across all temperatures with fixed composition; b) mean relevance scores overall compositions at a fixed temperature; c) mean relevance score of a single spectrum over all models (which were identical in architecture and training but differed in initialization); and d) mean relevance scores over the whole training dataset. The shaded areas represent the standard deviation. The transparent rectangle corresponds to the inset's position.

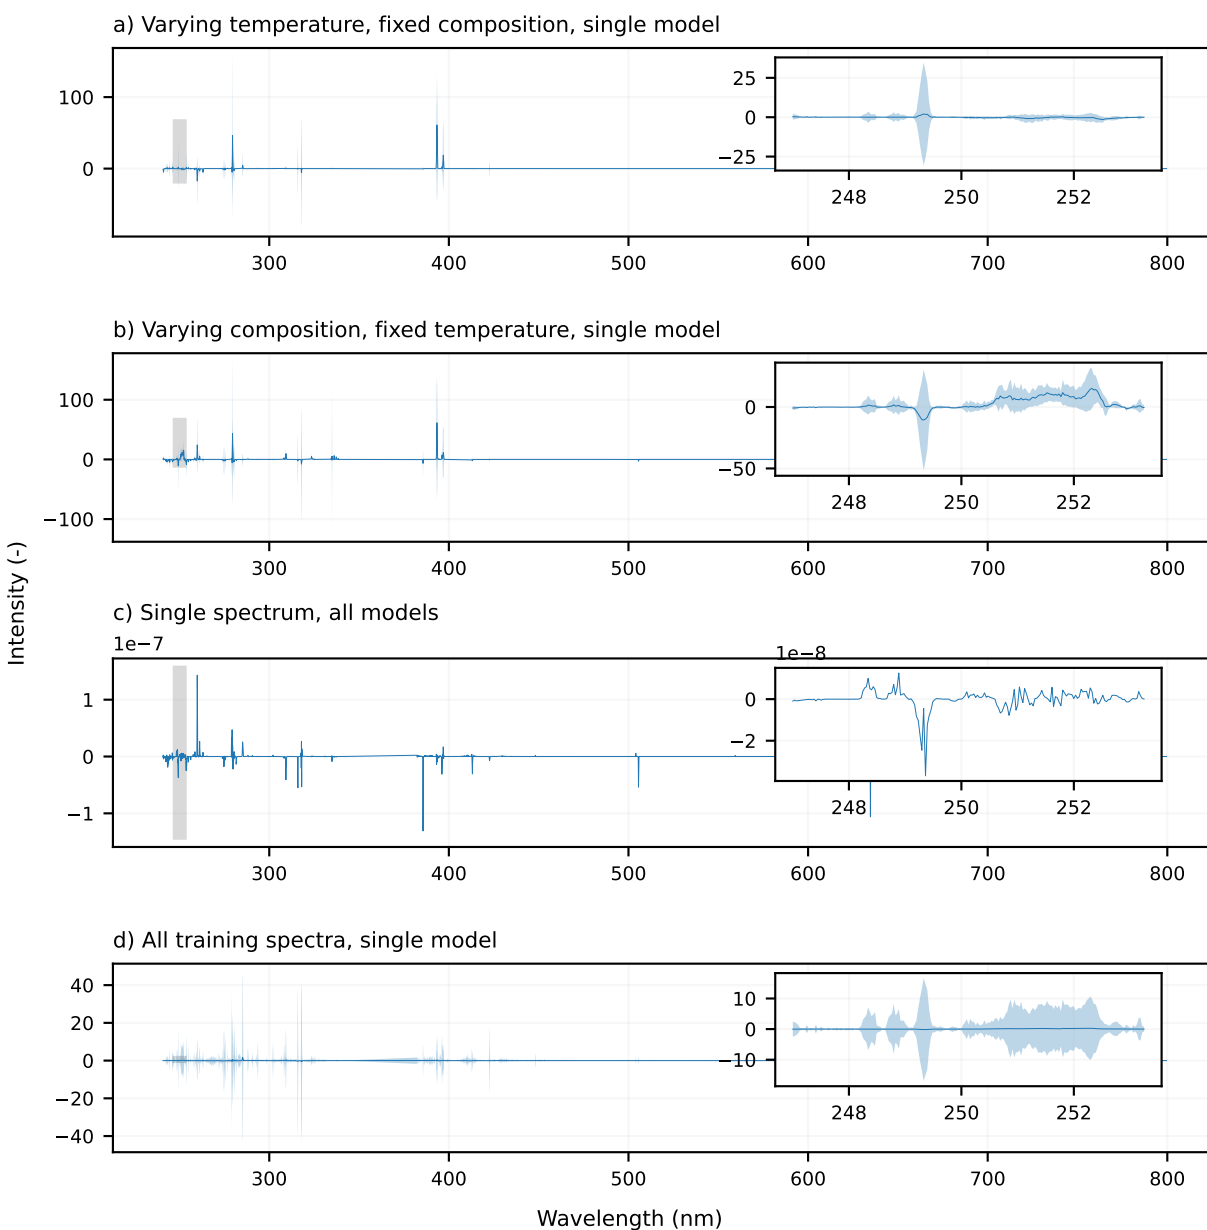

Figure S3: Summary of the first order Taylor approximation analysis: a) mean Taylor spectrum (second term on the right-hand side of Eq. 16 in the main text) across all temperatures with a fixed composition; b) Taylor spectrum averaged over all compositions at a fixed temperature; c) mean Taylor spectrum of a single spectrum over all models (which were identical in architecture and training but differed in initialization); and d) mean relevance scores over the whole training dataset. The shaded areas represent the standard deviation. The transparent rectangle corresponds to the inset's position.
